# Supplementary material
Source: PubMed Central journal article supplement (PMC2532503)
Supplement: NIHMS63155-supplement-1si20060207_09.pdf [file NIHMS63155-supplement-1si20060207_09.pdf]

Supporting Information for:

## Dynamics of Proteins Encapsulated in Silica Sol-gel Glasses Studied with IR Vibrational Echo Spectroscopy

Aaron M. Massari, Ilya J. Finkelstein, and Michael D. Fayer\*

Department of Chemistry, Stanford University, Stanford, CA 94305, USA

\*email: [fayer@stanford.edu](mailto:fayer@stanford.edu)

### Best fit frequency-frequency correlation function (FFCF) parameters

|                            | $\Delta_0$ (cm <sup>-1</sup> ) | $\Delta_1$ (cm <sup>-1</sup> ) | $\tau_1$ (ps) | $\Delta_2$ (cm <sup>-1</sup> ) | $\tau_2$ (ps) |
|----------------------------|--------------------------------|--------------------------------|---------------|--------------------------------|---------------|
| <b>MbCO aqueous (A1)</b>   | 0.50                           | 5.34                           | 0.25          | 3.41                           | 11.98         |
| <b>MbCO sol-gel (A1)</b>   | 1.25                           | 5.33                           | 0.18          | 3.24                           | 16.22         |
| <b>HbCO aqueous (CIII)</b> | 2.29                           | 5.56                           | 0.18          | 2.32                           | 8.39          |
| <b>HbCO sol-gel (CIII)</b> | 2.24                           | 6.01                           | 0.14          | 2.28                           | 9.79          |

**Table S1.** Best fit FFCF parameters for MbCO and HbCO in aqueous and sol-gel environments. The functional form of the FFCF,  $C(t)$ , is a biexponential plus a constant:

$$C(t) = \Delta_0^2 + \Delta_1^2 \exp(-t / \tau_1) + \Delta_2^2 \exp(-t / \tau_2)$$

These values simultaneously reproduce the experimentally measured linear IR spectra and the vibrational echo decays at several  $T_w$  delay times.
